# Supplementary material
Source: Springer Nature journal article supplement (https://www.springermedizin.de/resource/supplementary/12887_2014_1170_MOESM1_ESM.pdf/9476696)

**A**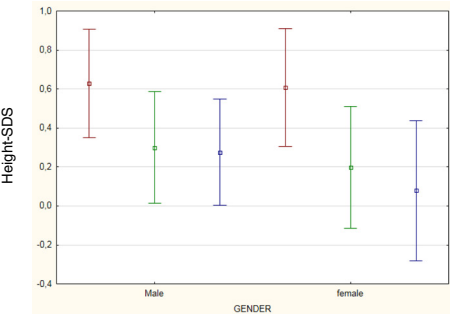**B**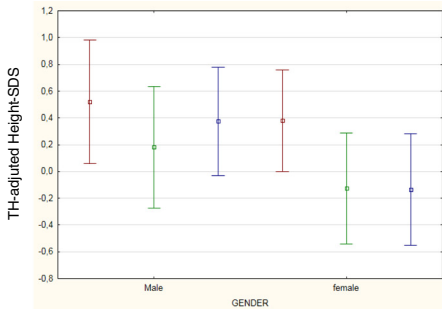

Supplement: MOESM1 [file 9476696]
